# Supplementary material for: Amorphous calcium carbonate monohydrate containing a defect hydrate network by mechanochemical processing of mono-hydrocalcite using ethanol as auxiliary solvent
Source: Royal Society of Chemistry journal article supplement (doi:10.1039/d2ce00677d), 2022-01-01
Supplement: d2ce00677d1.pdf [file d2ce00677d1.pdf]

## Electronic Supplementary Information (ESI)

### Amorphous Calcium Carbonate Monohydrate Containing a Defect Hydrate Network by Mechanochemical Processing of Mono-hydrocalcite using Ethanol as Auxiliary Solvent

Marcel Maslyk, Mihail Mondeshki and Wolfgang Tremel\*

Department Chemie, Johannes Gutenberg-Universität  
Duesbergweg 10-14, D-55099 Mainz, Germany

#### Table of Contents

|                   |                                                                                  |    |
|-------------------|----------------------------------------------------------------------------------|----|
| <b>Figure S1.</b> | Powder X-ray diffraction pattern of monohydrocalcite ball-milled in cyclohexane. | S2 |
| <b>Figure S2.</b> | <sup>13</sup> C SP NMR spectrum of crystalline monohydrocalcite.                 | S3 |
| <b>Figure S3.</b> | <sup>13</sup> C CP NMR spectra of crystalline monohydrocalcite.                  | S4 |

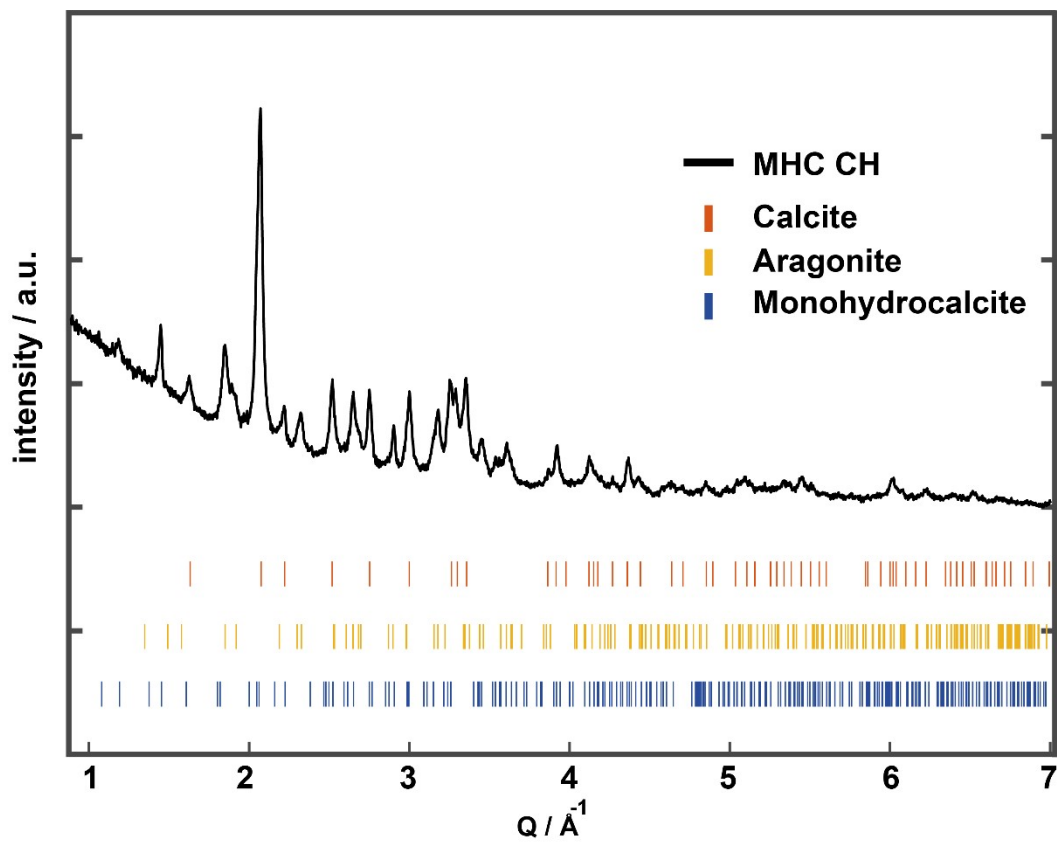

**Figure S1.** Powder X-ray diffraction pattern of monohydrocalcite ball-milled in cyclohexane. Different from grinding in ethanol, no complete amorphization occurs and additionally aragonite and calcite are formed.

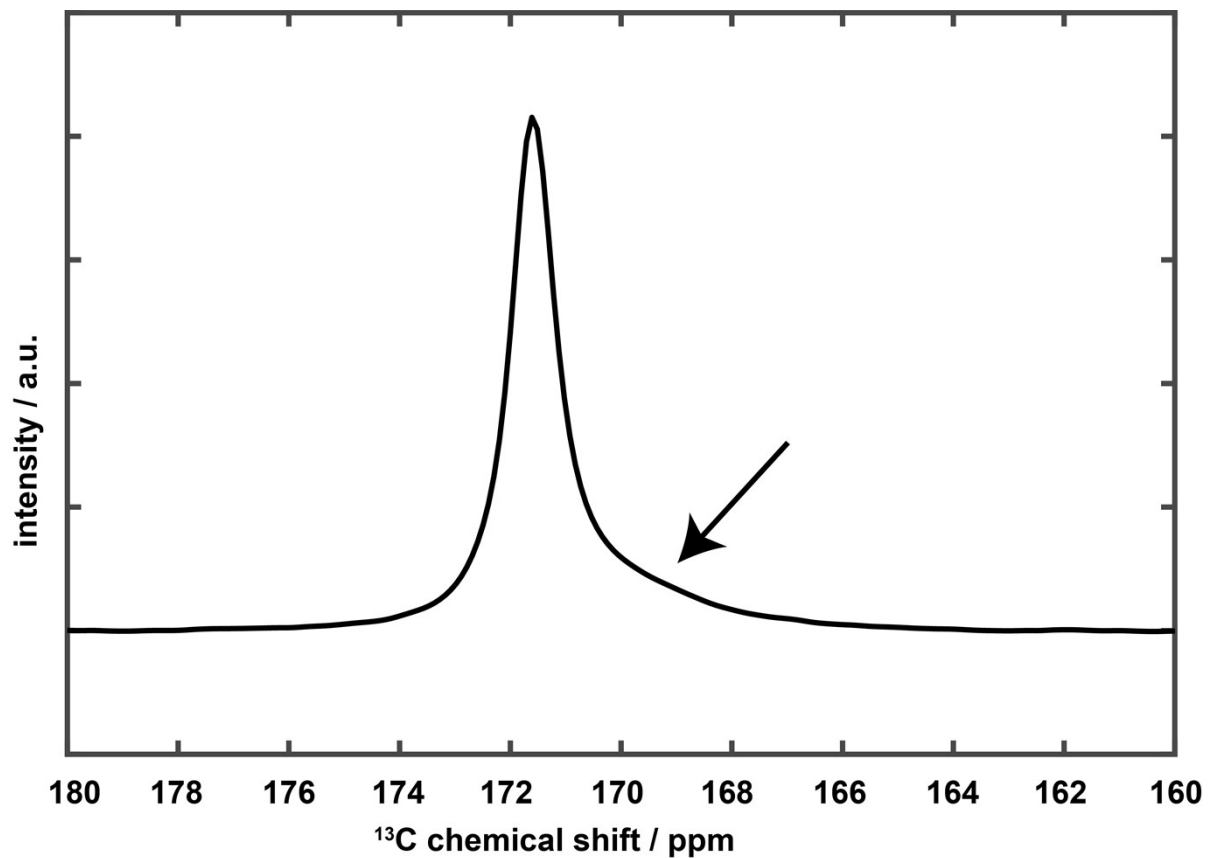

**Figure S2.**  $^{13}\text{C}$  SP NMR spectrum of  $^{13}\text{C}$  enriched monohydrocalcite. The spectrum shows a small asymmetry in the peak shape, probably due to minor amorphous impurities (indicated by the arrow).

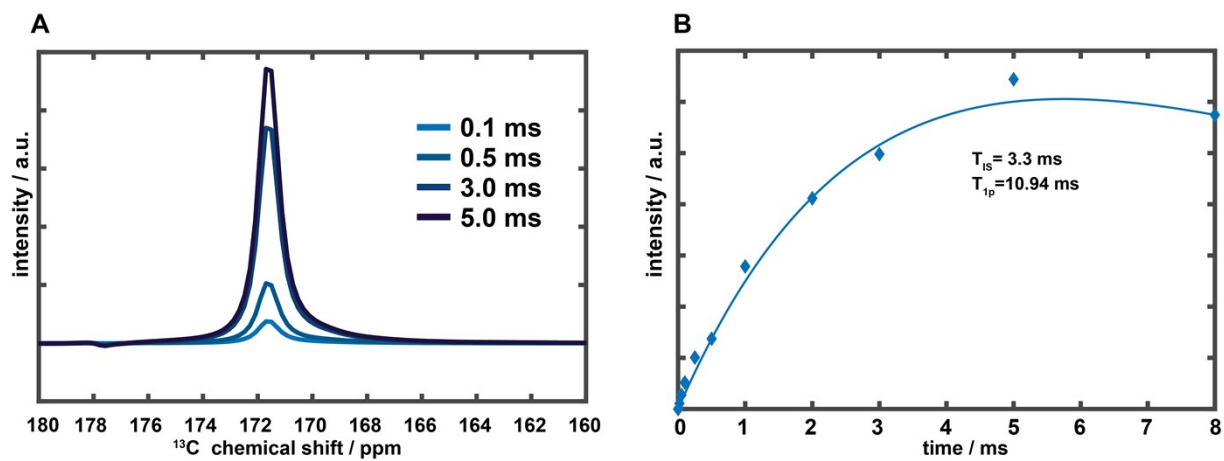

**Figure S3.** <sup>13</sup>C CP NMR spectra (A) of monohydrocalcite at different contact times and the corresponding fit (B) according to the I-S classic model (see main text).
